# Supplementary material for: Deep-Learning-Based Analysis Reveals a Social Behavior Deficit in Mice Exposed Prenatally to Nicotine
Source: MDPI journal article supplement (doi:10.3390/cells13030275), 2024-02-01
Supplement: s1 [file s1]

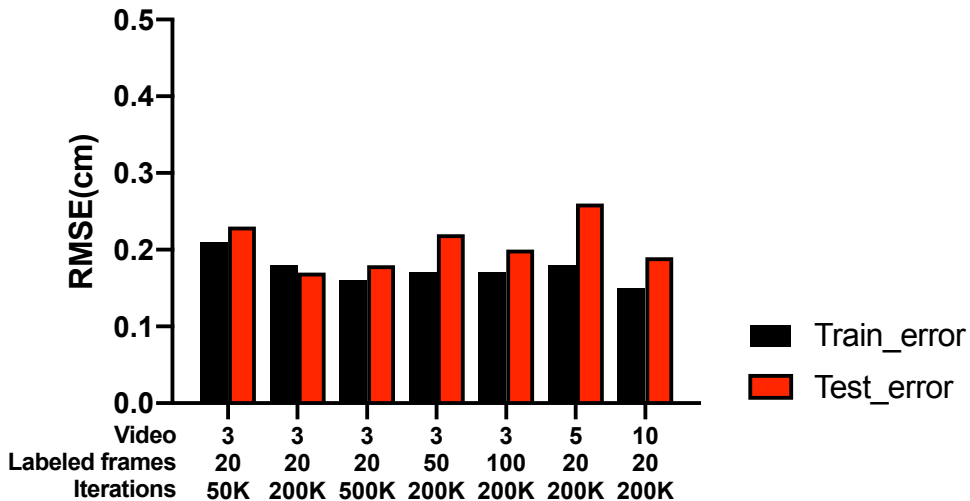

Grooming Count (n)

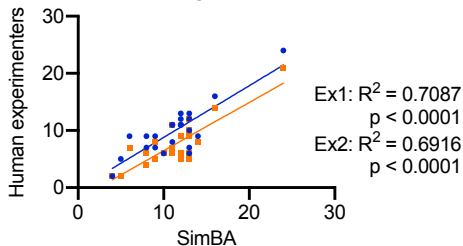

Grooming duration (sec)

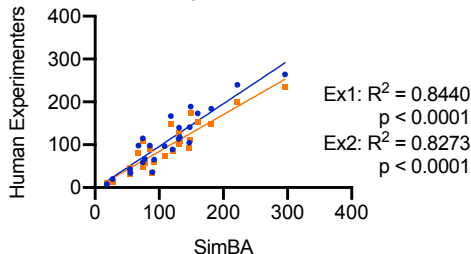

Rearing count (n)

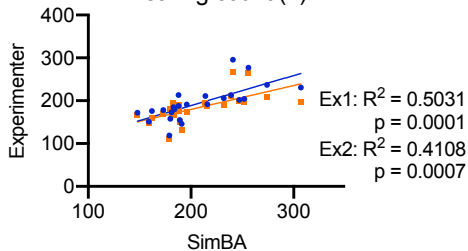

Rearing duration (sec)

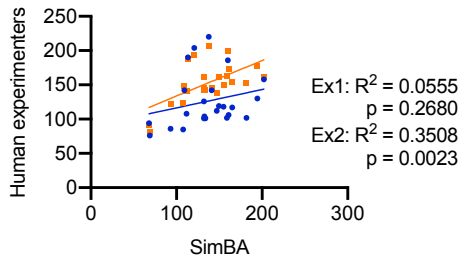

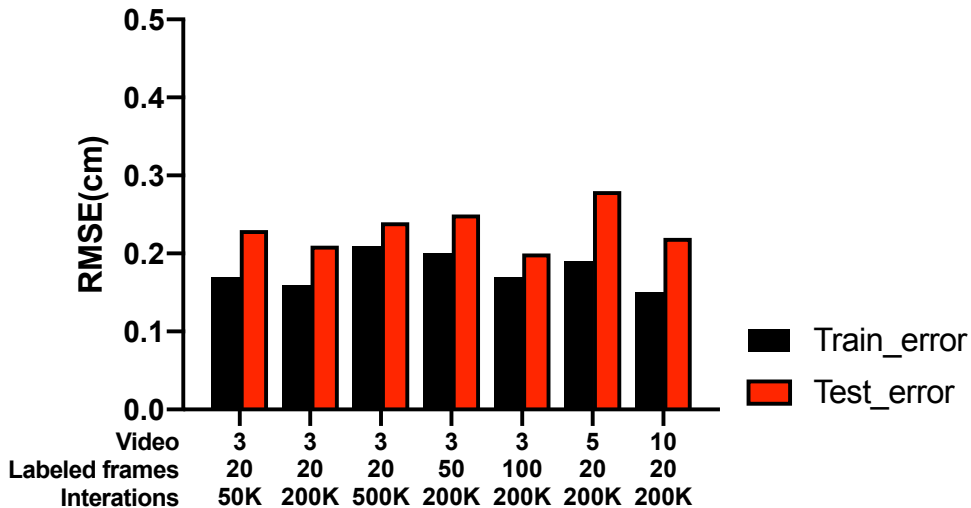

Following Count (n)

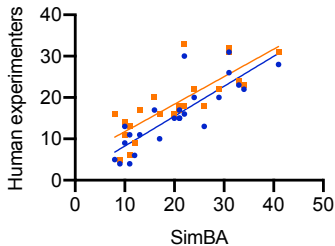Ex1:  $R^2 = 0.7044$  $p < 0.0001$ Ex2:  $R^2 = 0.6428$  $p < 0.0001$ 

Following duration (sec)

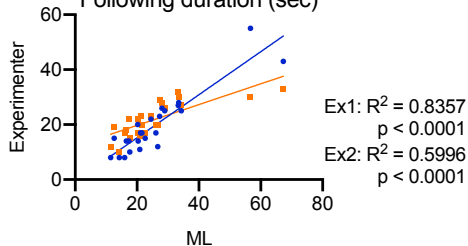Ex1:  $R^2 = 0.8357$  $p < 0.0001$ Ex2:  $R^2 = 0.5996$  $p < 0.0001$ 

Sniffing Count (n)

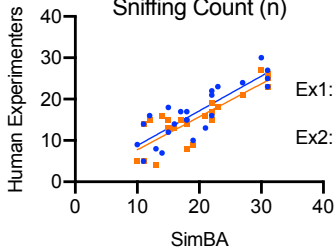Ex1:  $R^2 = 0.7239$  $p < 0.0001$ Ex2:  $R^2 = 0.7173$  $p < 0.0001$ 

Sniffing duration (sec)

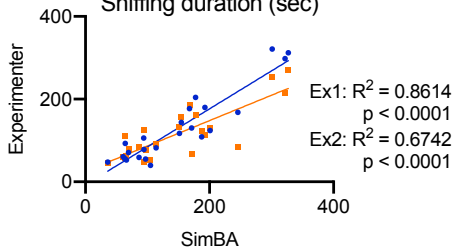Ex1:  $R^2 = 0.8614$  $p < 0.0001$ Ex2:  $R^2 = 0.6742$  $p < 0.0001$
